# Supplementary material for: Improvement of the reverse tetracycline transactivator by single amino acid substitutions that reduce leaky target gene expression to undetectable levels
Source: PubMed Central journal article supplement (PMC4914848; doi:10.1038/srep27697), 2016-06-21
Supplement: srep27697-s1.pdf [file srep27697-s1.pdf]

# **Improvement of the reverse tetracycline transactivator by single amino acid substitutions that reduce leaky target gene expression to undetectable levels**

**Ian J. Roney<sup>1,2</sup>, Adam D. Rudner<sup>1,3</sup>, Jean-Francois Couture<sup>1,3</sup>,  
and Mads Kærn<sup>1,2,4,5\*</sup>**

<sup>1</sup>Ottawa Institute of Systems Biology, University of Ottawa, Ottawa, K1H8L1, Canada.

<sup>2</sup>Department of Cellular and Molecular Medicine, University of Ottawa, Ottawa, K1H8L1, Canada.

<sup>3</sup>Department of Biochemistry, Microbiology and Immunology, University of Ottawa, Ottawa, K1H8L1, Canada.

<sup>4</sup>Department of Physics, University of Ottawa, Ottawa, K1N6N5, Canada

<sup>5</sup>Cancer Therapeutics Program, Ottawa Hospital Research Institute, Ottawa, K1H8L6, Canada

\*correspondence should be addressed to M.K by email at: [mkaern@uottawa.ca](mailto:mkaern@uottawa.ca)

The following blots were cropped to produce the inset of Figure 2a.

**a**

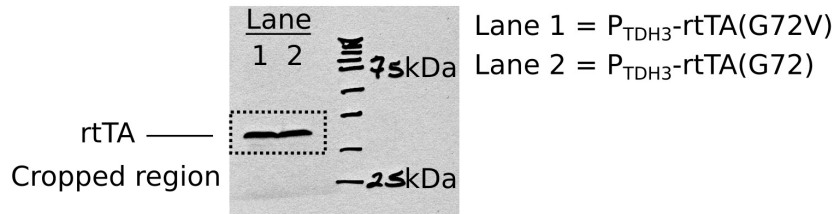

**b**

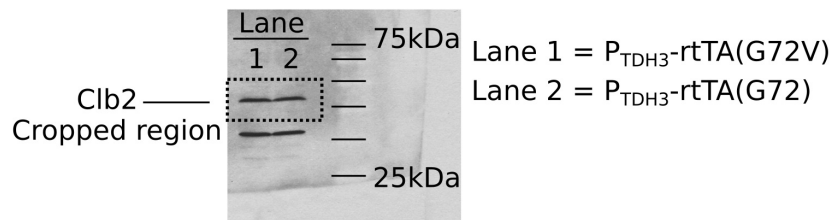

Supplemental figure S1. Glycine to valine substitution at residue 72 does not affect steady state protein levels. **a**, Western blot comparing the rtTA protein abundances of the rtTA-M2 and rtTA-M2(G72V) variants when expressed from the TDH3 promoter. **b**, Loading control comparing protein abundances of Clb2 in strains expressing the rtTA-M2 variant or rtTA-M2(G72V) variant.

The following blots were cropped to produce Figure 3B.

**a**

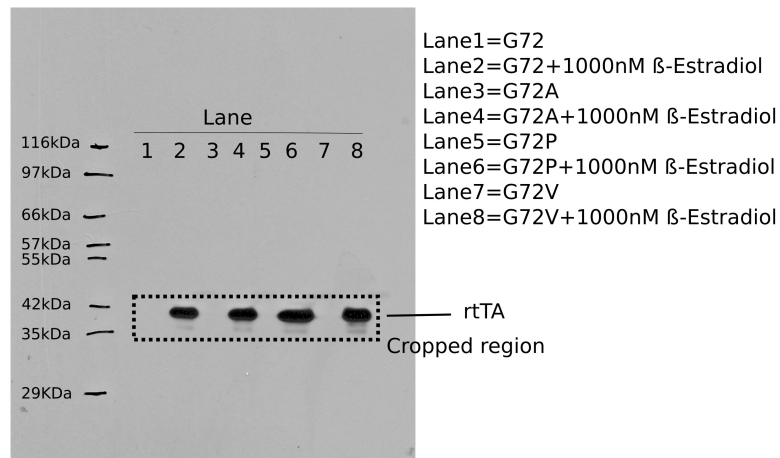

**b**

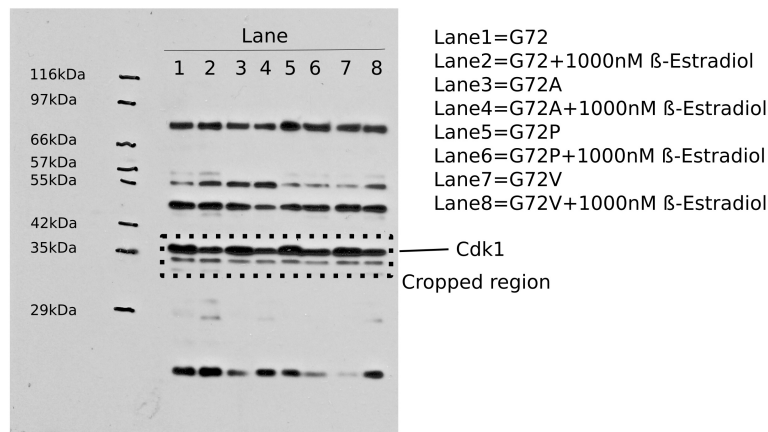

Supplemental Figure S2. Substitution of glycine for non-polar side chains at residue 72 does not affect steady state protein levels. **a**, Western blot comparing the rtTA protein abundances of all four rtTA variants when cells were induced by 1000nM of  $\beta$ -estradiol or no induction. **b**, Loading control comparing protein abundances of Cdk1 when cells expressing the four rtTA variants were induced by 1000nM of  $\beta$ -estradiol or no induction.

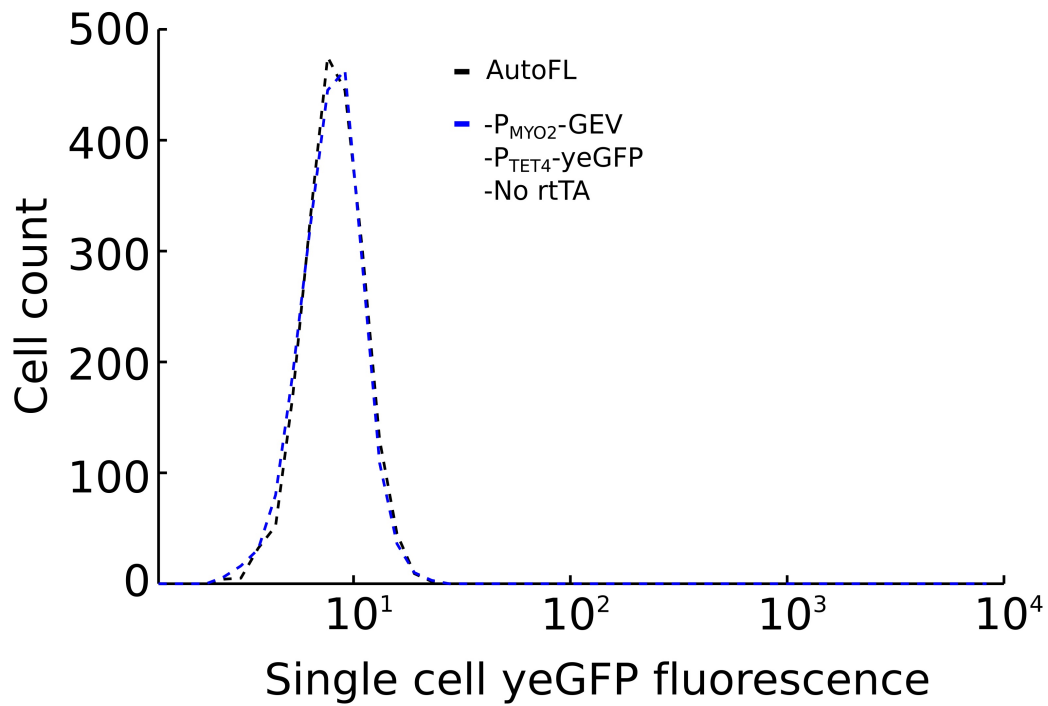

Supplemental Figure S3. yeGFP expression from the P<sub>TET4</sub> promoter and GEV cassette alone is indistinguishable from autofluorescence of wildtype BY4742 yeast cells when cells were cultured in 1000nM  $\beta$ -estradiol.

**a**

### Basal activity

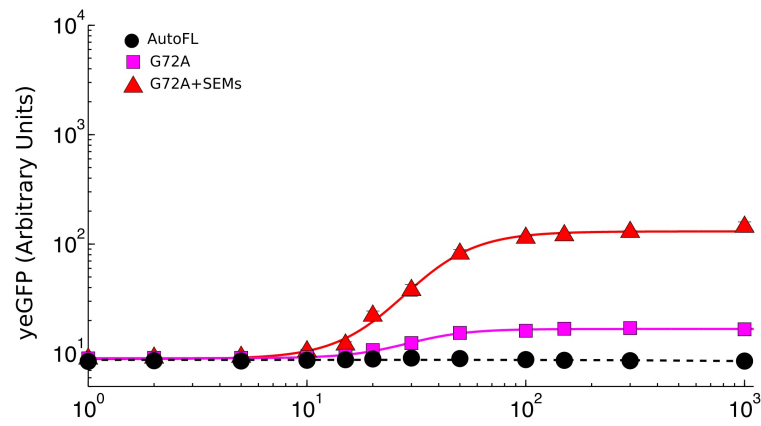**b**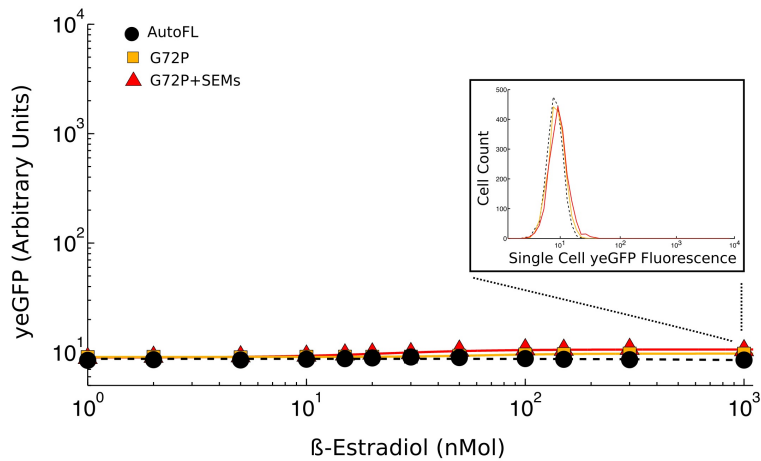

Supplemental Figure S4. **a,b**, The basal activity of rtTA variants as a function of their  $\beta$ -estradiol-dependent expression level (mean +/- s.e.m of three technical replicates). In the inset of **b**, histograms of single cell fluorescence of the G72P variant and a SE-G72P variant cultured in 1000nM  $\beta$ -estradiol.

**a**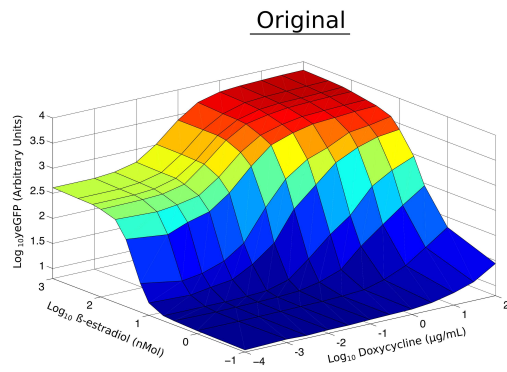**b**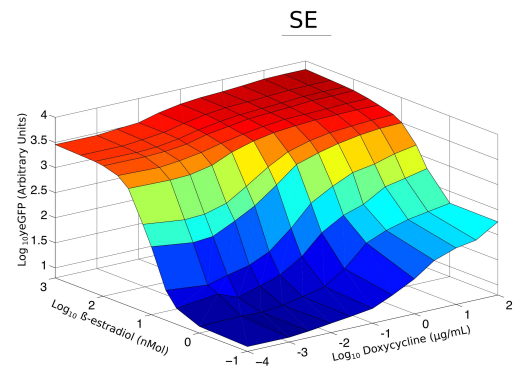**c**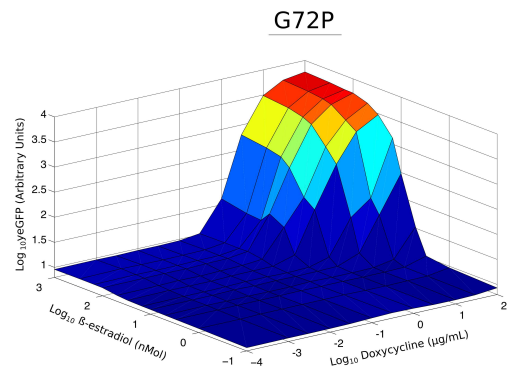**d**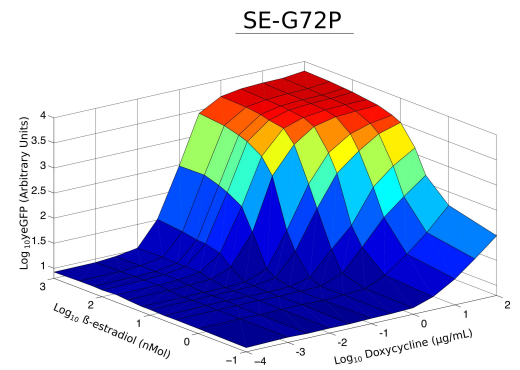

Supplemental Figure S5. Surface plots of the data presented in Figure 4 (c-f). **a-d**, Surface plots displaying reporter expression (Arbitrary units) as a function of  $\beta$ -estradiol-dependent transactivator expression and doxycycline induction.
